# Supplementary material for: Antioxidants improve IVF outcome and subsequent embryo development in the mouse
Source: Oxford University Press journal article supplement (doi:10.1093/humrep/dex330), 2017-10-12
Supplement: dex330suppl_table1.pdf [file dex330suppl_table1.pdf]

**Supplementary Table S1** Effect of antioxidants on fertilization and development rate of blastocysts in IVF.

|            | <b>IVF<br/>Culture</b>  | <b>Control<br/>Control</b> | <b>Control<br/>A3</b> | <b>A3<br/>Control</b> | <b>A3<br/>A3</b> |
|------------|-------------------------|----------------------------|-----------------------|-----------------------|------------------|
| Cell stage | Two cell <sup>a</sup>   | 61 (84.7%)                 | 62 (86.1%)            | 65 (90.3%)            | 63 (87.5%)       |
|            | Morula <sup>b</sup>     | 61 (100%)                  | 62 (100%)             | 65 (100%)             | 63 (100%)        |
|            | Blastocyst <sup>b</sup> | 57 (93.4%)                 | 59 (95.2%)            | 63 (96.9%)            | 61 (96.8%)       |
|            | Hatching <sup>b</sup>   | 53 (86.9%)                 | 53 (85.5%)            | 61 (93.8%)            | 40 (63.5%)       |

Combination of antioxidants (A3) comprises of 10  $\mu$ M Acetyl-L-Carnitine/10  $\mu$ M N-Acetyl-L-Cysteine/5  $\mu$ M  $\alpha$ -Lipoic Acid. Antioxidants were in IVF media and/or culture media. Control was IVF media and/or culture media with no antioxidants. Number (%) of embryos developed to each stage; 72 oocytes inseminated per group; 6 biological replicates.

<sup>a</sup>Percentage of the number of inseminated oocytes.

<sup>b</sup>Percentage of the number of two cell embryos.
