# Supplementary material for: Antioxidants improve IVF outcome and subsequent embryo development in the mouse
Source: Oxford University Press journal article supplement (doi:10.1093/humrep/dex330), 2017-10-12
Supplement: dex330suppl_table2.pdf [file dex330suppl_table2.pdf]

**Supplementary Table SII Effect of antioxidants in gamete collection on fertilization and development rate of blastocysts in IVF.**

|            | <b>Oocyte<br/>Sperm</b> | <b>Control<br/>Control</b> | <b>Control<br/>A3</b> | <b>A3<br/>Control</b> | <b>A3<br/>A3</b> |
|------------|-------------------------|----------------------------|-----------------------|-----------------------|------------------|
| Cell stage | Two cell <sup>a</sup>   | 79 (82.3%)                 | 88 (91.6%)            | 83 (86.5%)            | 81 (84.4%)       |
|            | Morula <sup>b</sup>     | 78 (98.7%)                 | 88 (100%)             | 83 (100%)             | 81 (100%)        |
|            | Blastocyst <sup>b</sup> | 75 (94.9%)                 | 86 (97.7%)            | 83 (100%)             | 80 (98.7%)       |
|            | Hatching <sup>b</sup>   | 47 (59.5%)                 | 52 (59.0%)            | 50 (60.2%)            | 53 (65.4%)       |

Combination of antioxidants (A3) comprises of 10  $\mu$ M Acetyl-L-Carnitine/10  $\mu$ M N-Acetyl-L-Cysteine/5  $\mu$ M  $\alpha$ -Lipoic Acid. Antioxidants were in oocyte IVF media and/or sperm IVF media. Controls had no antioxidants in oocyte IVF media and/or sperm IVF media. Number (%) of embryos developed to each stage; 96 oocytes inseminated per group; 6 biological replicates.

<sup>a</sup>Percentage of the number of inseminated oocytes.

<sup>b</sup>Percentage of the number of two cell embryos.
